# Supplementary material
Source: PubMed Central journal article supplement (PMC4240998)
Supplement: rspb20142103supp1.pdf [file rspb20142103supp1.pdf]

Fig. S1 Phylogeny of 107 carnivorous mammals.

(Please zoom for detail)

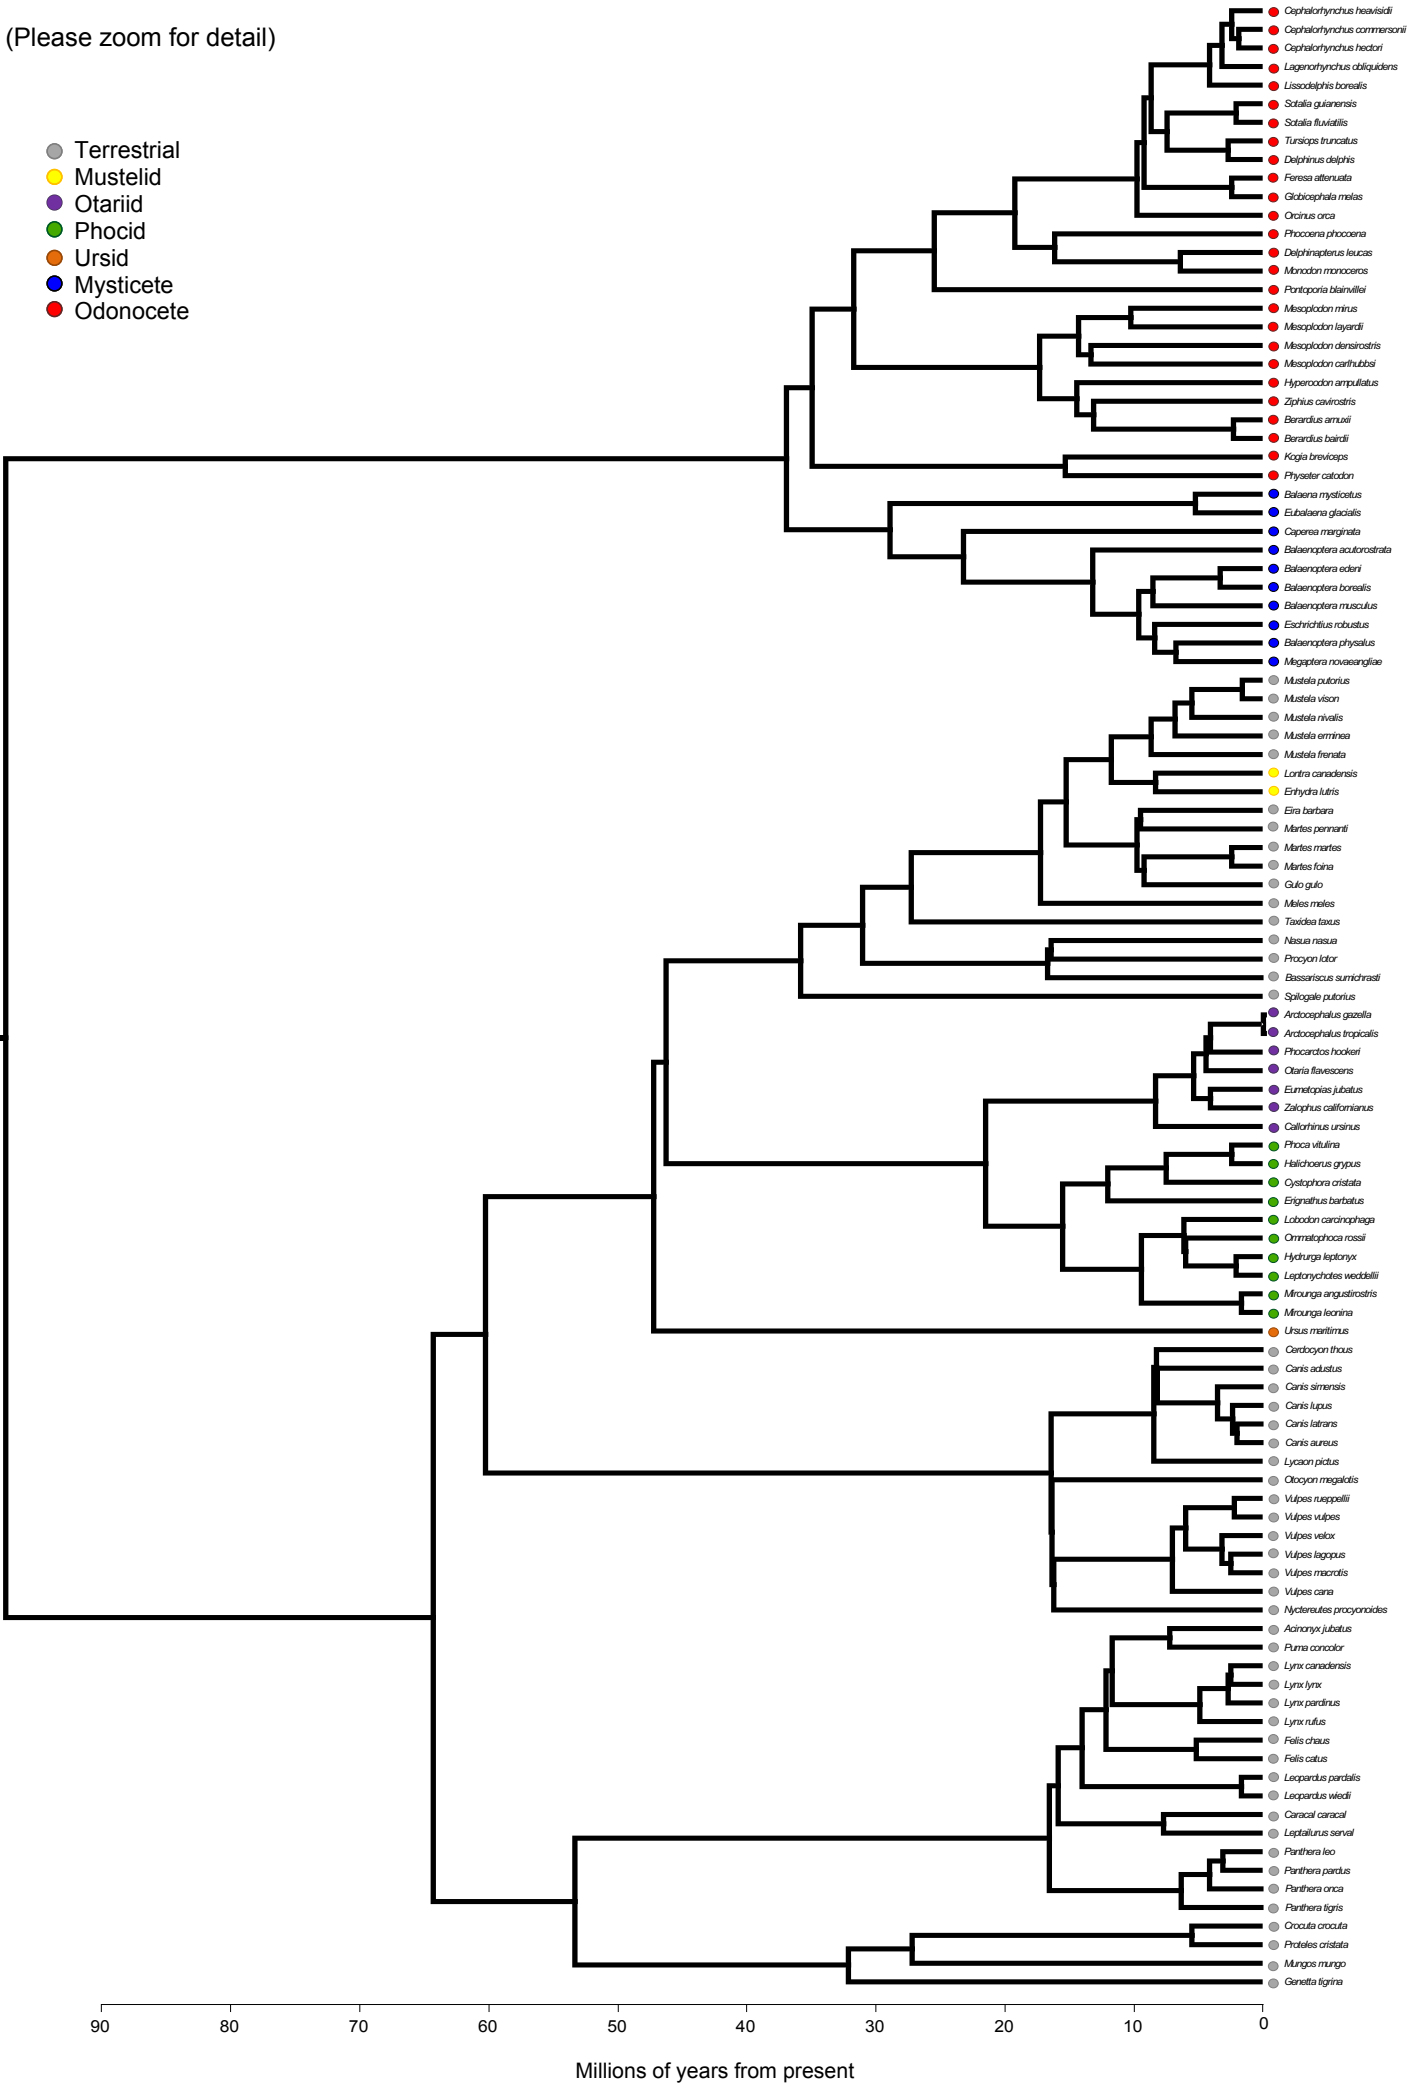

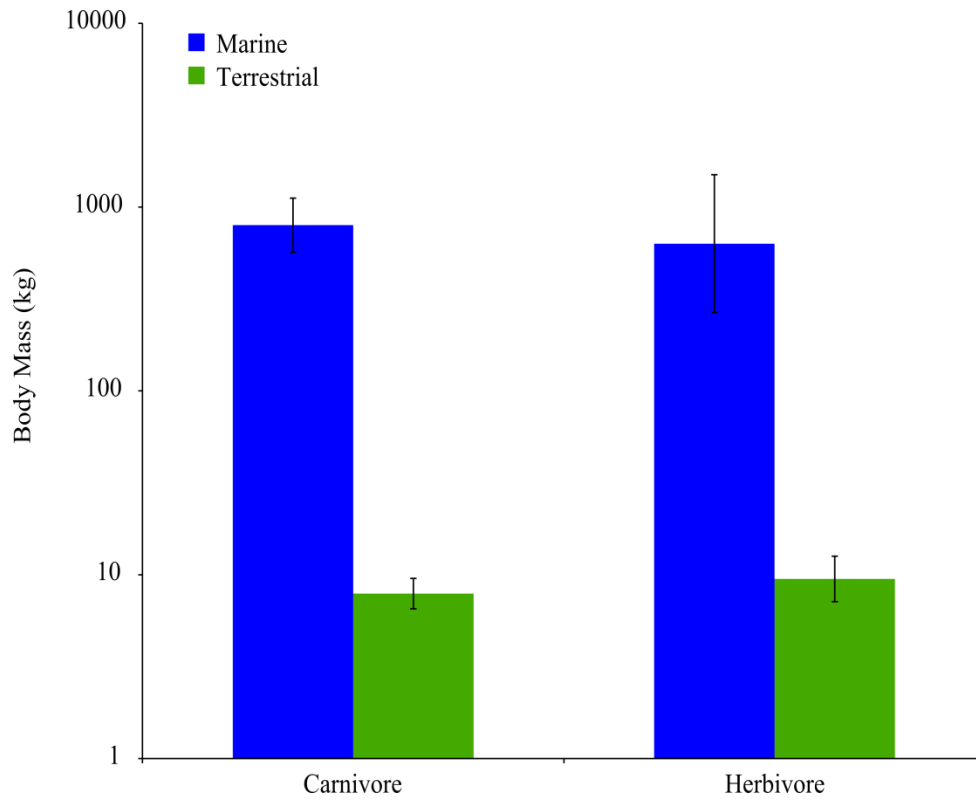

**Figure S2.** Log<sub>10</sub> mean body mass for mammalian carnivores and herbivores living in terrestrial and marine environments  $\pm$  S.E. Untransformed mean values for terrestrial carnivores (20kg), marine carnivores (9805kg), terrestrial herbivores (190kg) and marine herbivores (4067kg).
